# Supplementary material for: Image reconstruction in graphic design based on Global residual Network optimized compressed sensing model
Source: PeerJ Comput Sci. 2024 Aug 8;10:e2227. doi: 10.7717/peerj-cs.2227 (PMC11639127; doi:10.7717/peerj-cs.2227)
Supplement: Supplemental Information 1 [file peerj-cs-10-2227-s001.xlsx]

## Sheet: Figure 4
	SR=0.01	SR=0.04	SR=0.10	SR=0.25
5	20.8	24.3	26.4	30.82
10	20.83	24.32	26.8	30.88
15	20.83	24.35	26.9	31.22
20	20.84	24.4	27.3	31.4
25	20.85	24.5	27.4	31.6
30	20.86	24.6	27.5	31.9
35	20.87	24.6	27.5	32.1
40	20.88	24.65	27.55	32.15
45	20.89	24.7	27.7	32.45
50	20.89	24.82	27.78	32.62
55	20.89	24.9	28	33
60	20.9	24.9	28.05	33.08
65	20.9	25	28.09	33.04
70	20.9	25.05	28.05	33.06
75	20.89	25.05	28.05	33.08
80	20.9	25.07	28.07	33.06
85	20.91	25.05	28.05	33.08
90	20.9	25.03	28.06	33.08
95	20.9	25	28.05	33.07
100	20.91	25	28.06	33.08

## Sheet: Figure 5
	SR=0.01	SR=0.04	SR=0.1	SR=0.25
ReconNet	0.0112	0.011	0.0107	0.0101
NL-MRN	0.0324	0.0323	0.0317	0.0312
ISTA-Net	0.1382	0.1353	0.1474	0.1424
SCSNet	0.0693	0.0746	0.0816	0.0954
GMNet	0.0109	0.0104	0.0101	0.0099
Ours	0.073	0.0743	0.0712	0.0696

## Sheet: Figure 6
	SR=0.01	SR=0.04	SR=0.1	SR=0.25
ReconNet	17.63	20.27	22.63	25.59
NL-MRN	18.01	21.16	23.94	28.73
ISTA-Net	18.06	22.42	26.37	31.34
SCSNet	22.3	24.87	28.1	32.72
GMNet	22.23	24.76	28.11	32.7
Ours	22.5	25.5	28.75	33.54

## Sheet: Figure 7
	SR=0.01	SR=0.04	SR=0.1	SR=0.25
ReconNet	0.5322	0.6306	0.7119	0.8069
NL-MRN	0.5619	0.6746	0.7712	0.8668
ISTA-Net	0.5354	0.7272	0.8523	0.935
SCSNet	0.7136	0.8179	0.8921	0.9493
GMNet	0.712	0.8169	0.8899	0.9469
Ours	0.728	0.8465	0.9132	0.9591
